# Supplementary material for: The Drosophila F-box protein dSkp2 regulates cell proliferation by targeting Dacapo for degradation
Source: PubMed Central journal article supplement — Mol Biol Cell. 2013 Jun 1;24(11):1676–87. doi: 10.1091/mbc.E12-10-0772 (PMC3667721; doi:10.1091/mbc.e12-10-0772), 2013-06-01
Supplement: supp_E12-10-0772v1_CombinedSupMats.pdf [file supp_E12-10-0772v1_CombinedSupMats.pdf]

## Legends to Supplementary Figures

Figure S1. Semi-quantitative RT-PCR showing the knockdown efficiency in two RNAi lines. Salivary glands of the 3<sup>rd</sup> instar larvae of *wild type*, *dSkp2*<sup>KK108837</sup> and *dSkp2*<sup>GD5142</sup> in combination with *Sgs-Gal4*, respectively, were used for total RNA extraction. Rp49 represents the internal control.

Figure S2. Quantitative presentation of the WHS phenotype caused by *dSkp2* RNAi. Wing hair cells are marked with blue filled black circles in a corresponding region in *wild type* (A) and *dSkp2* (B) knockdown region. White arrows indicate the multiple wing hairs in the wings with *dSkp2* knockdown. (C) is a bar graph showing the number of wing hair cells within six equal-sized areas of *wt* and *dSkp2* knockdown adult wings. \*\*indicates  $p < 0.01$ .

Figure S3. High magnification images showing the WHS phenotype of *dap* overexpression or *dSkp2* knockdown in the wing. (A) A control wing of *en-Gal4*. (B) *dSkp2* knockdown in the posterior region of the wing under the control of *en-Gal4* leads to a typical WHS phenotype. Overexpression of *dap* in independent transgenic lines (C-C' and D-D''''') under the control of *en-Gal4* causes similar phenotypes.

Figure S4. Wing hair spacing phenotype caused by overexpression of cell cycle regulator genes. Shown are wings with *en-Gal4*-driven overexpression of *Cks85A* (B), *CycE* (C) or *Cdk2* (D) in the posterior region of the wing. The detected WHS phenotype is similar to that of *dSkp2* knockdown.

Figure S5. *dSkp2* knockdown in the posterior region of the wing discs under the control of *en-Gal4* in combination with *UAS-dcr2* (marked by GFP, B and C) leads to an accumulation of endogenous Dap protein (B'). This effect is further enhanced by simultaneous knockdown of *Cks85A* (C'; see Discussion). In both cases, only a small fraction of disc cells exhibit increased accumulation of Dap signals (see Discussion). A and A' are controls.

wild type  
dSkp2<sup>GD5142</sup>  
dSkp2<sup>KK108837</sup>

*dSkp2*

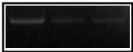

*Rp49*

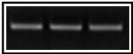

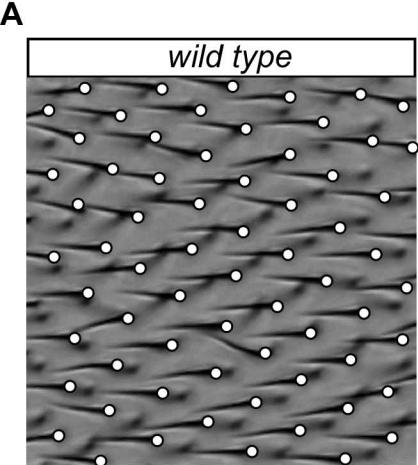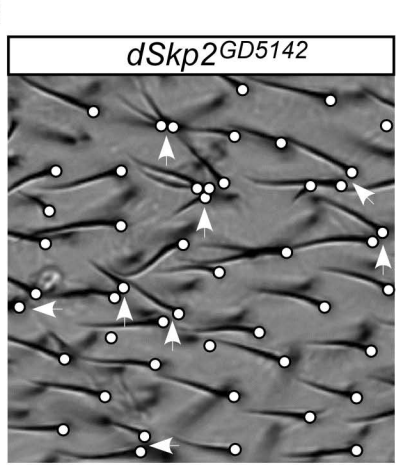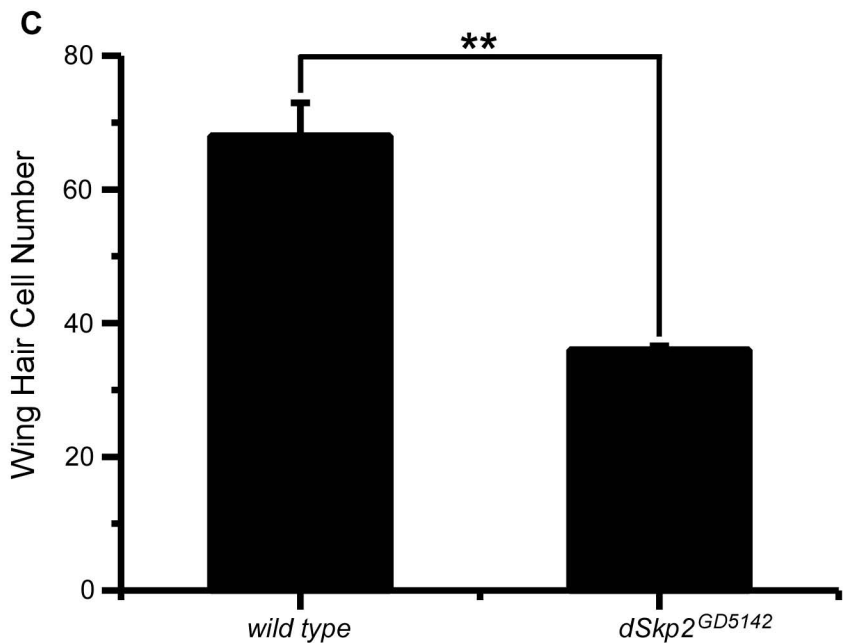

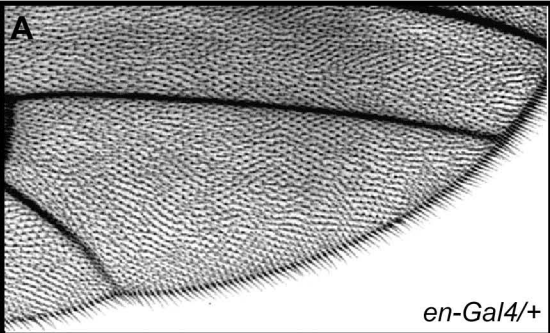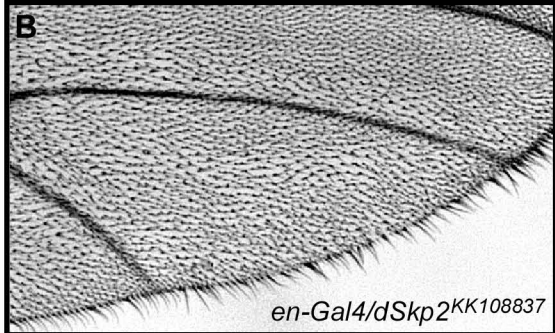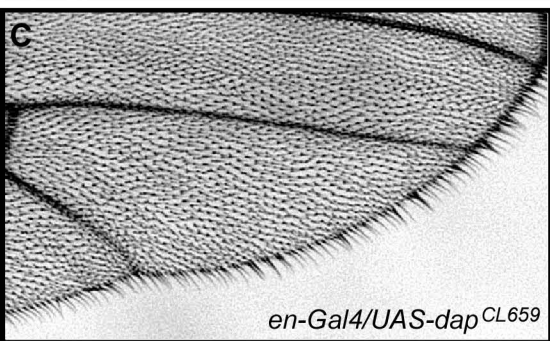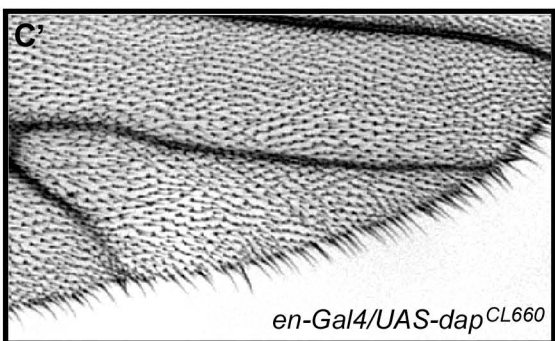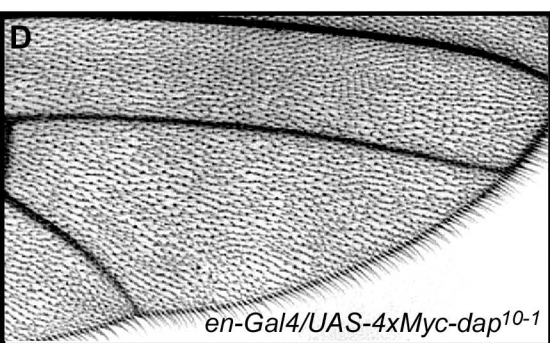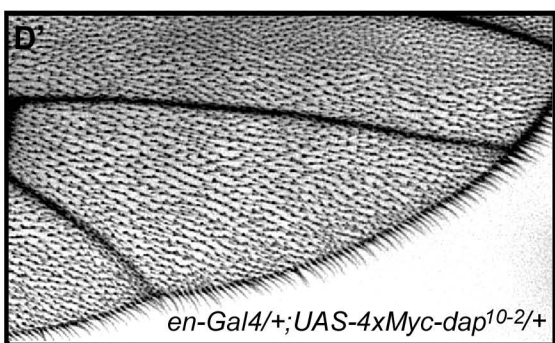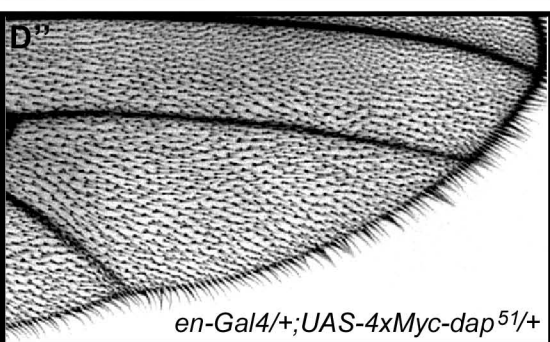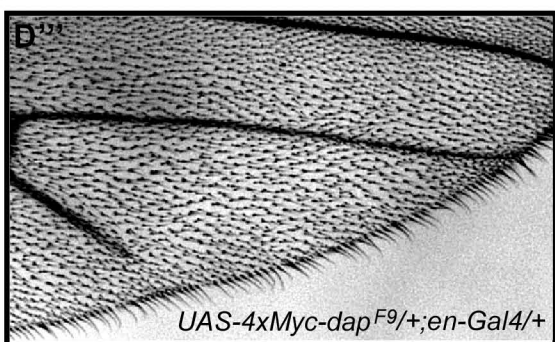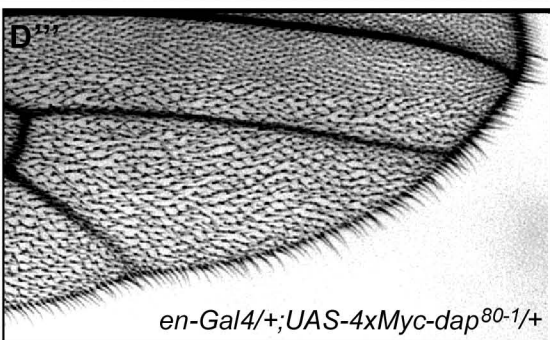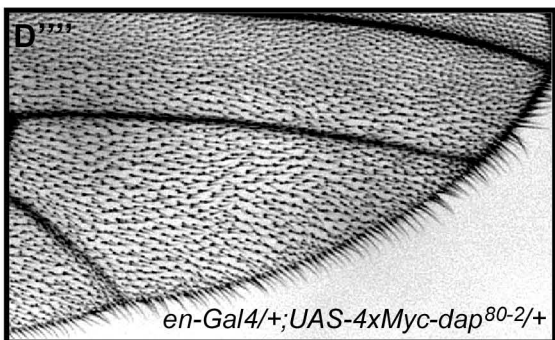

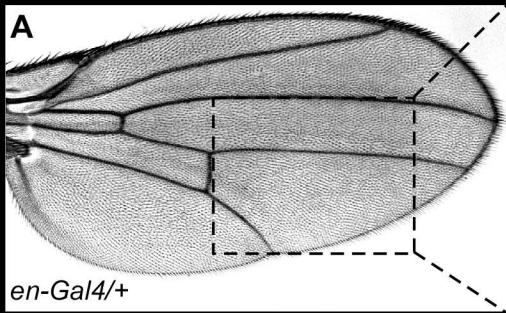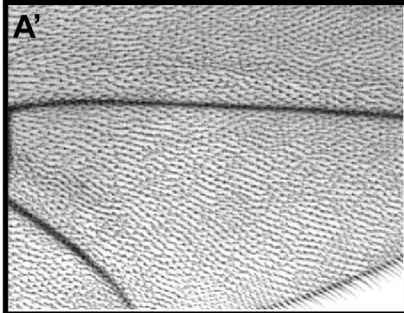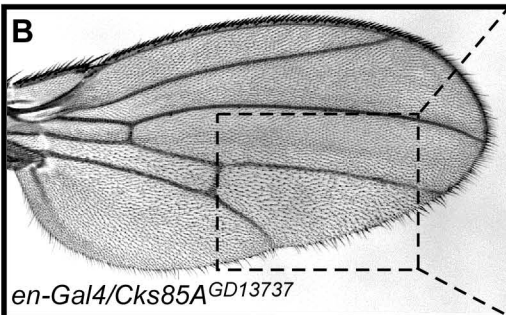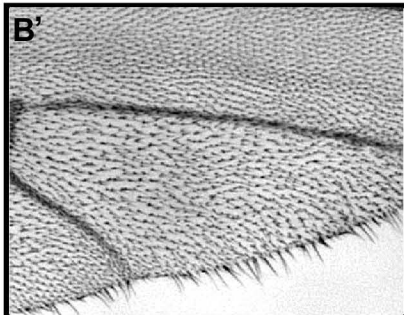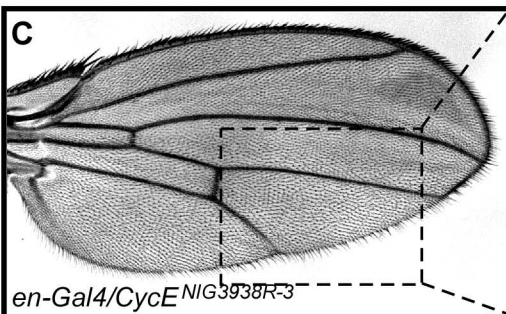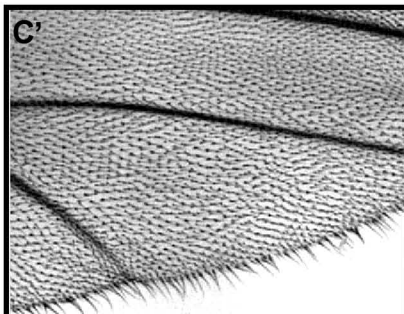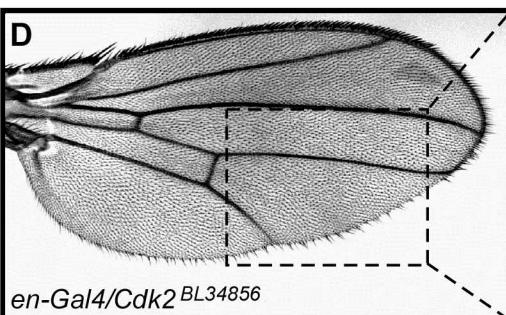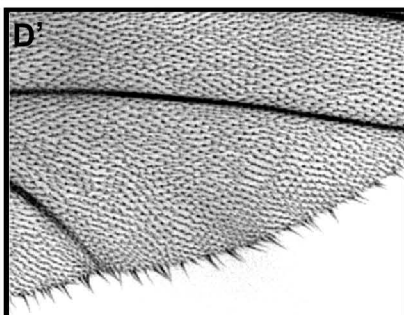



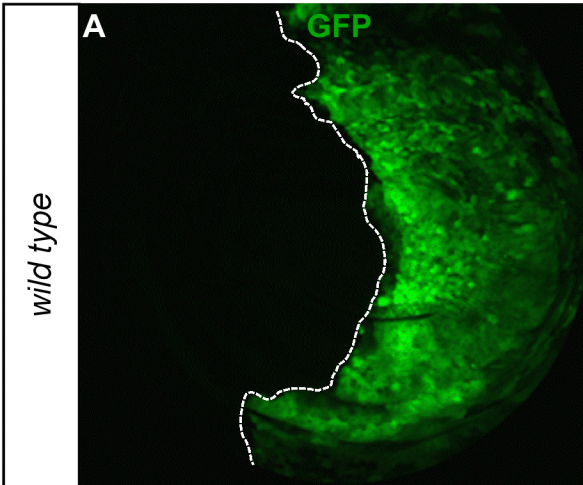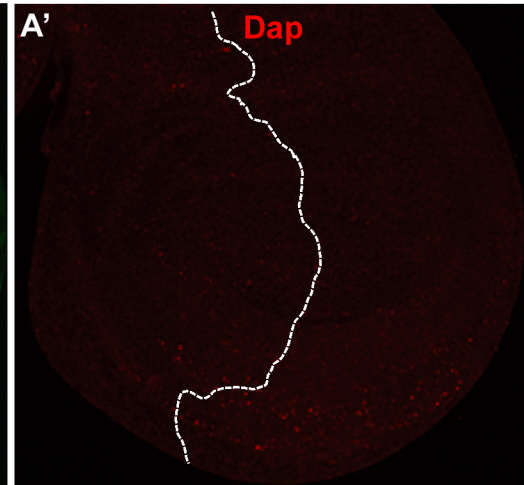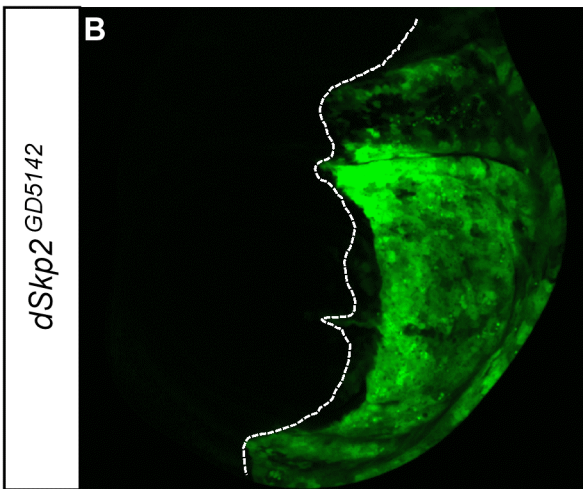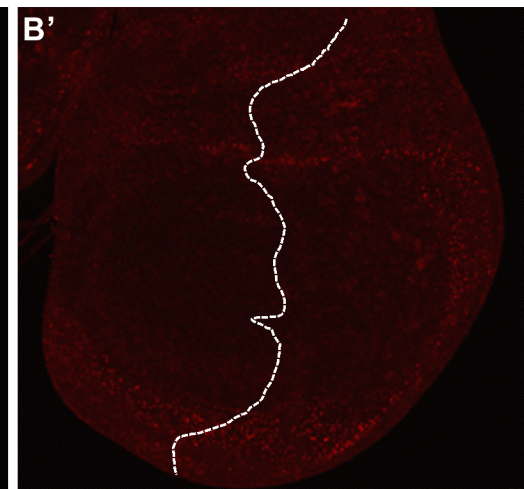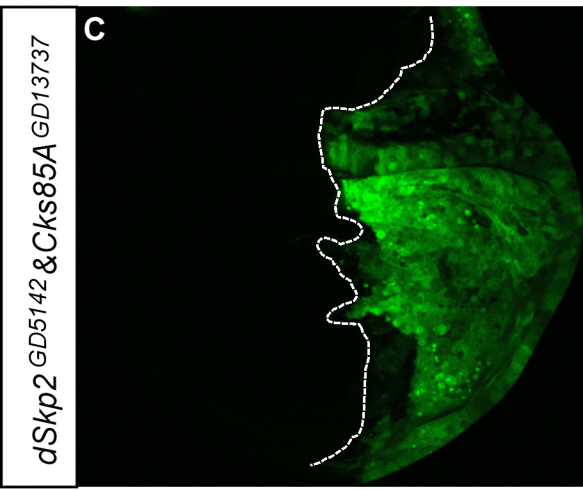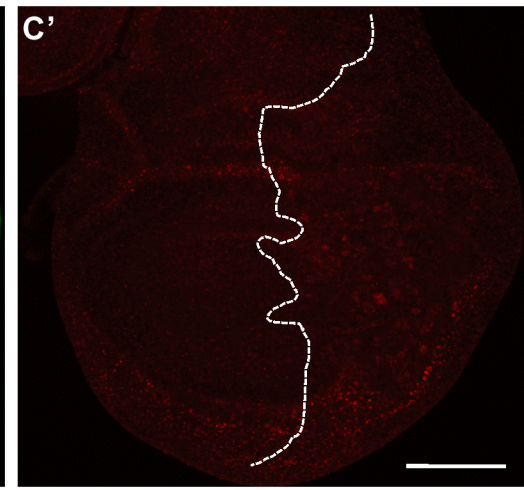

**Table S1. Different RNAi lines of *dSkp2* lead to similar phenotype**

|                                  | <i>en-Gal4</i> | <i>en-Gal4</i> in combination with <i>UAS-dcr2</i> |
|----------------------------------|----------------|----------------------------------------------------|
| <i>dSkp2</i> <sup>GD5142</sup>   | WHS++          | Die in pupae+++                                    |
| <i>dSkp2</i> <sup>KK108837</sup> | WHS+           | WHS++                                              |
| <i>dSkp2</i> <sup>JF01326</sup>  | Normal-        | WHS+                                               |
| <i>dSkp2</i> <sup>HMS00116</sup> | WHS+           | WHS++                                              |

WHS: Wing-Hair-Spacing
